# Supplementary material for: External validation of the ProVent score for prognostication of 1-year mortality of critically ill patients with prolonged mechanical ventilation: a single-centre, retrospective observational study in Austria
Source: HighWire-hosted journal article supplement (doi:10.1136/bmjopen-2022-066197), 2022-09-01
Supplement: bmjopen-2022-066197supp001_data_supplement.pdf [file bmjopen-2022-066197supp001_data_supplement.pdf]

## External validation of the ProVent score for prognostication of 1-year mortality of critically ill patients with prolonged mechanical ventilation: a retrospective observational study

**Additional File 1:** Kaplan Meier Plot demonstrating mortality up to 1 year after 21 days of invasive mechanical ventilation stratified by ProVent score. Higher ProVent scores are associated with higher mortality.

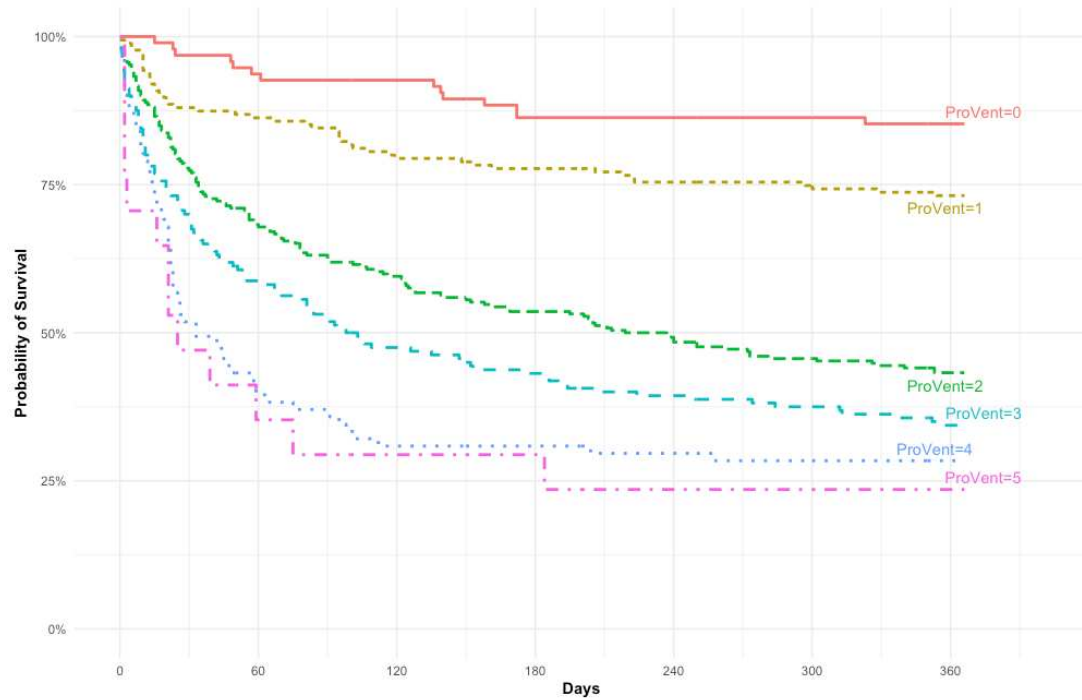

|           |     |     |     |     |     |     |     |
|-----------|-----|-----|-----|-----|-----|-----|-----|
| ProVent=0 | 95  | 89  | 88  | 82  | 82  | 82  | 81  |
| ProVent=1 | 175 | 151 | 139 | 136 | 132 | 131 | 128 |
| ProVent=2 | 252 | 172 | 150 | 135 | 124 | 115 | 109 |
| ProVent=3 | 160 | 94  | 76  | 69  | 63  | 60  | 55  |
| ProVent=4 | 81  | 32  | 25  | 25  | 24  | 23  | 23  |
| ProVent=5 | 17  | 6   | 5   | 5   | 4   | 4   | 4   |
